# Supplementary material
Source: ML conference proceedings conference paper supplement (https://openreview.net/forum?id=j52QcNiJ02)

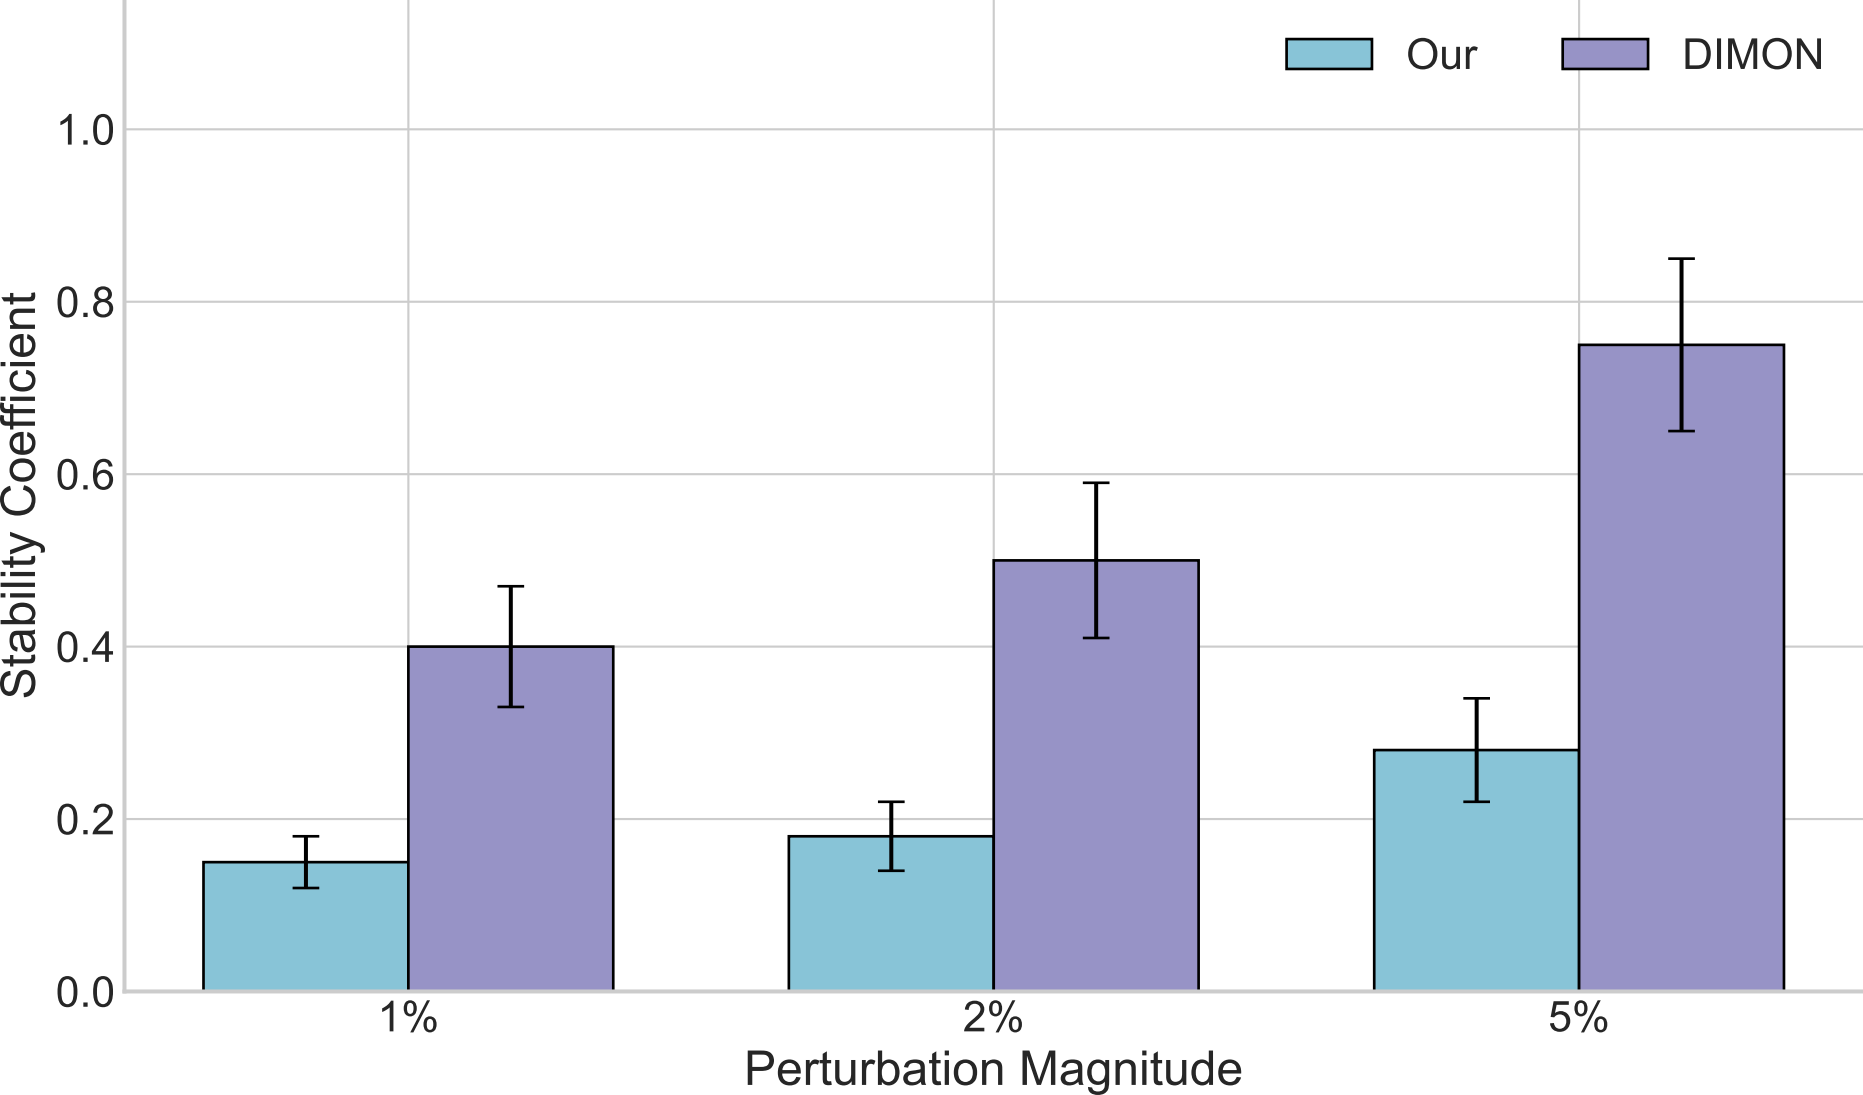

Supplement: supplementary_material [file chart_000.pdf › analysis_angle_000/charts/chart_000.pdf]

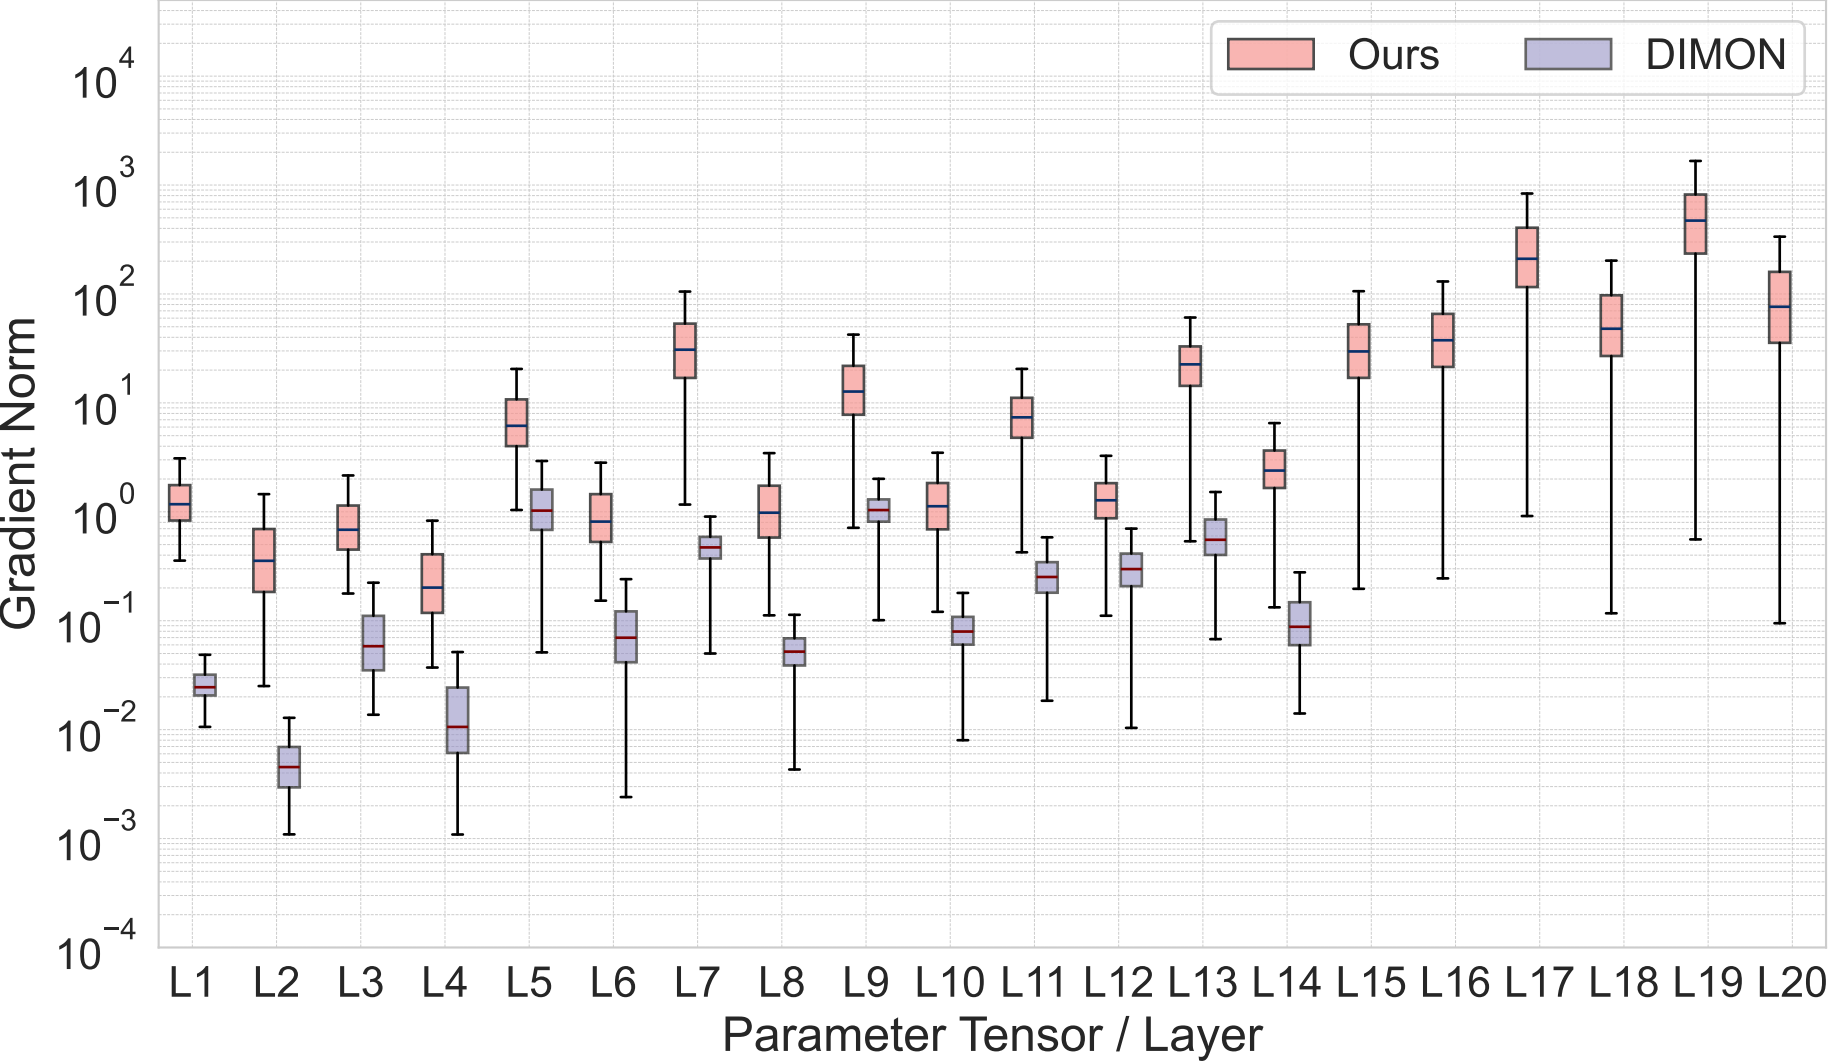

Supplement: supplementary_material [file chart_000.pdf › analysis_angle_003/charts/chart_000.pdf]

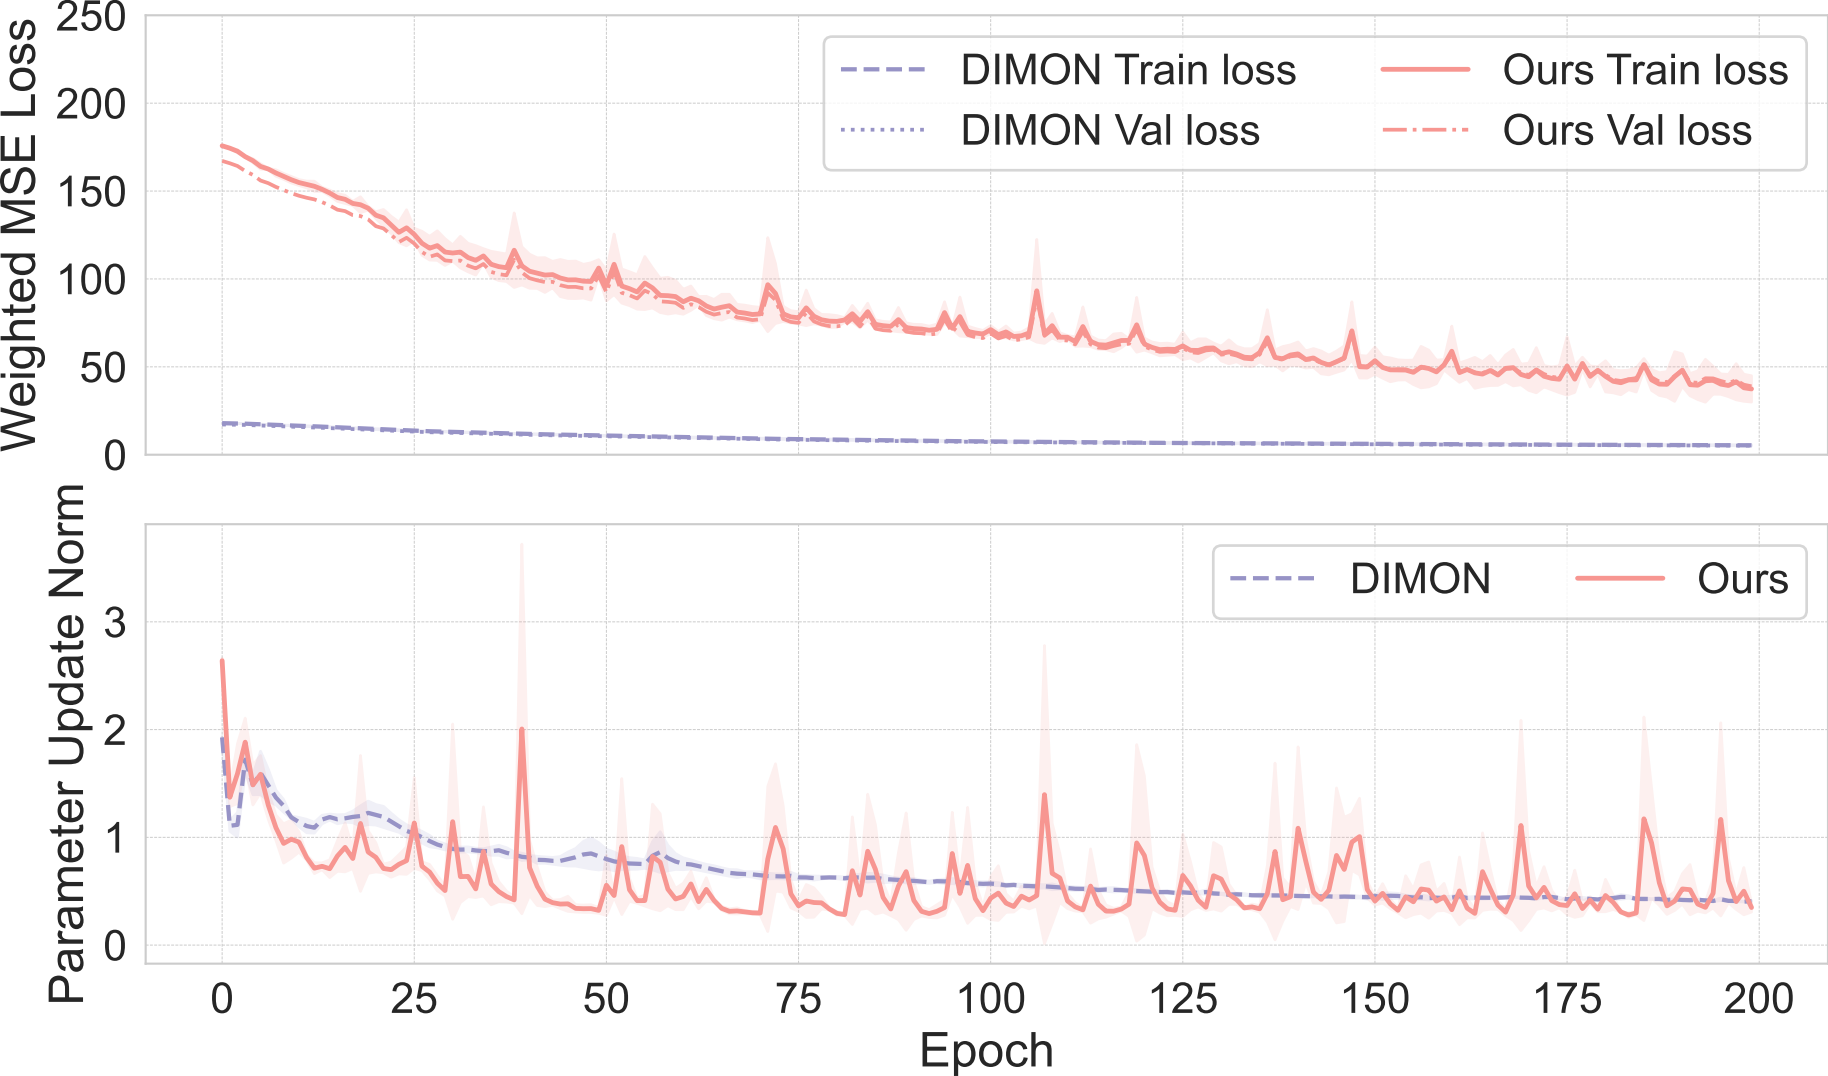

Supplement: supplementary_material [file chart_001.pdf › analysis_angle_003/charts/chart_001.pdf]

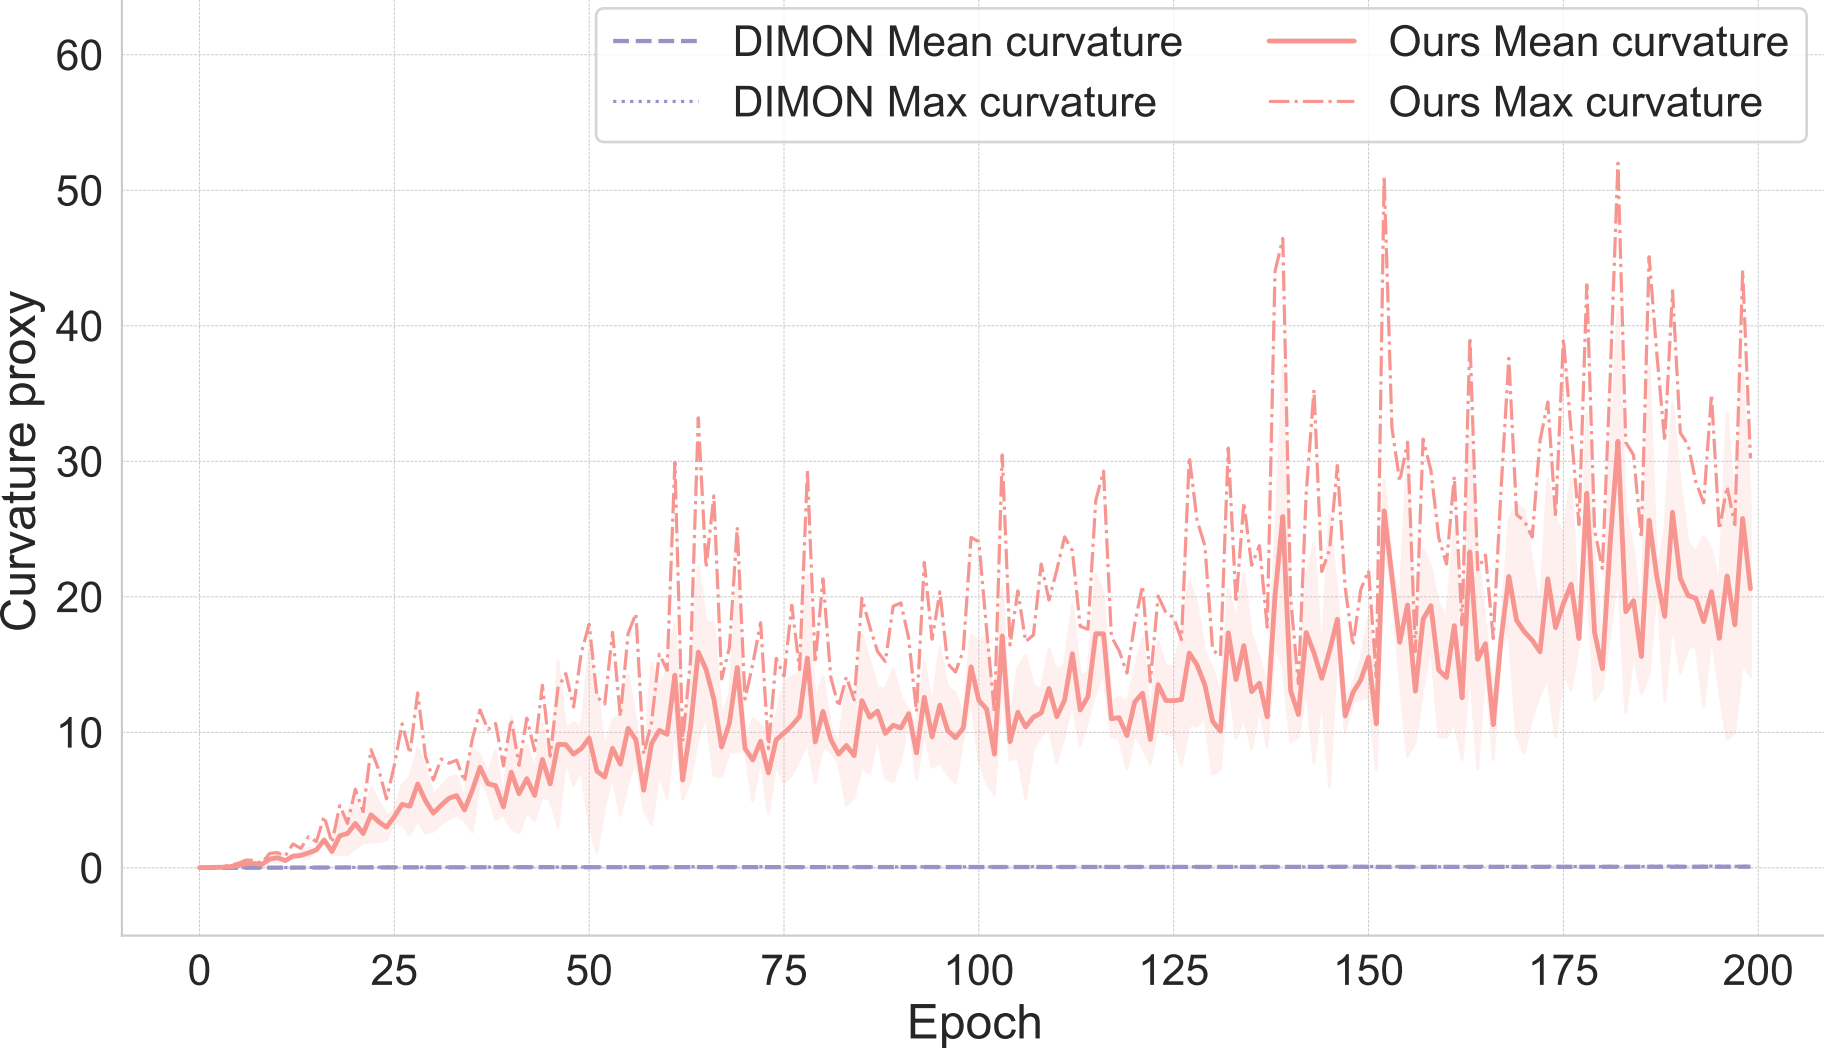

Supplement: supplementary_material [file chart_002.pdf › analysis_angle_003/charts/chart_002.pdf]

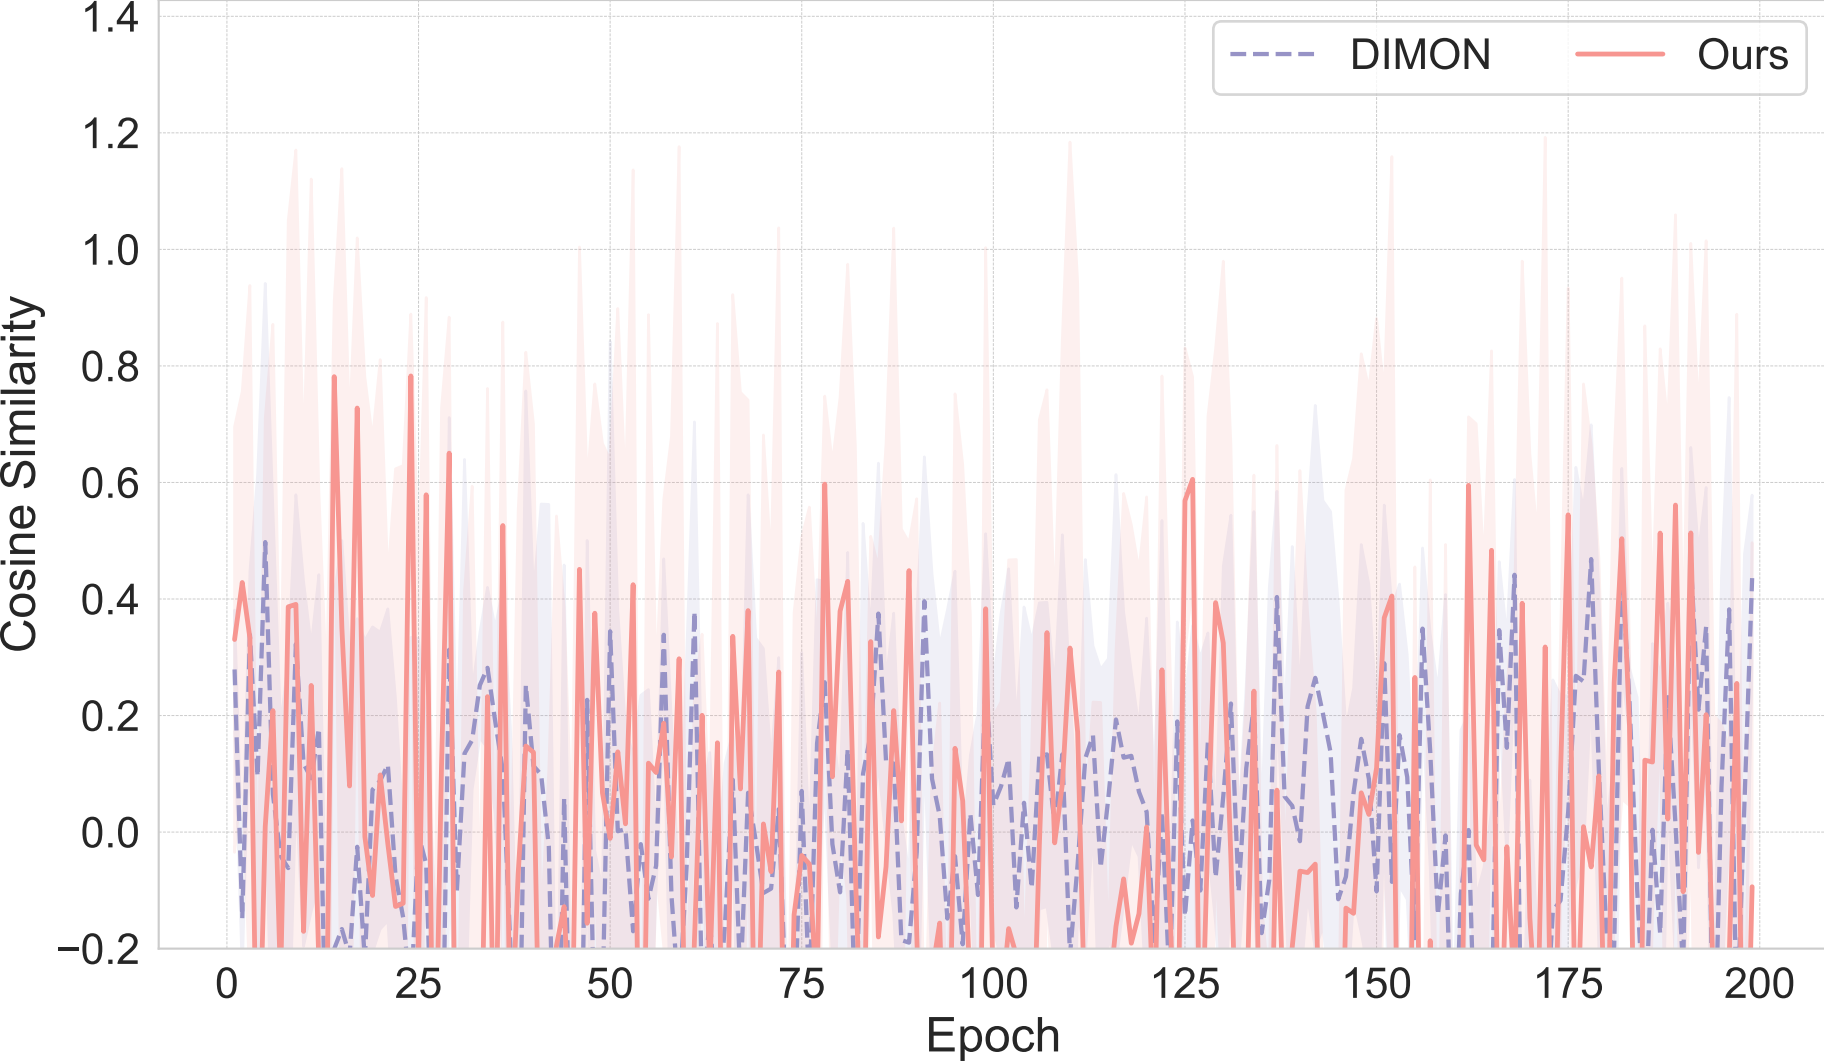

Supplement: supplementary_material [file chart_003.pdf › analysis_angle_003/charts/chart_003.pdf]

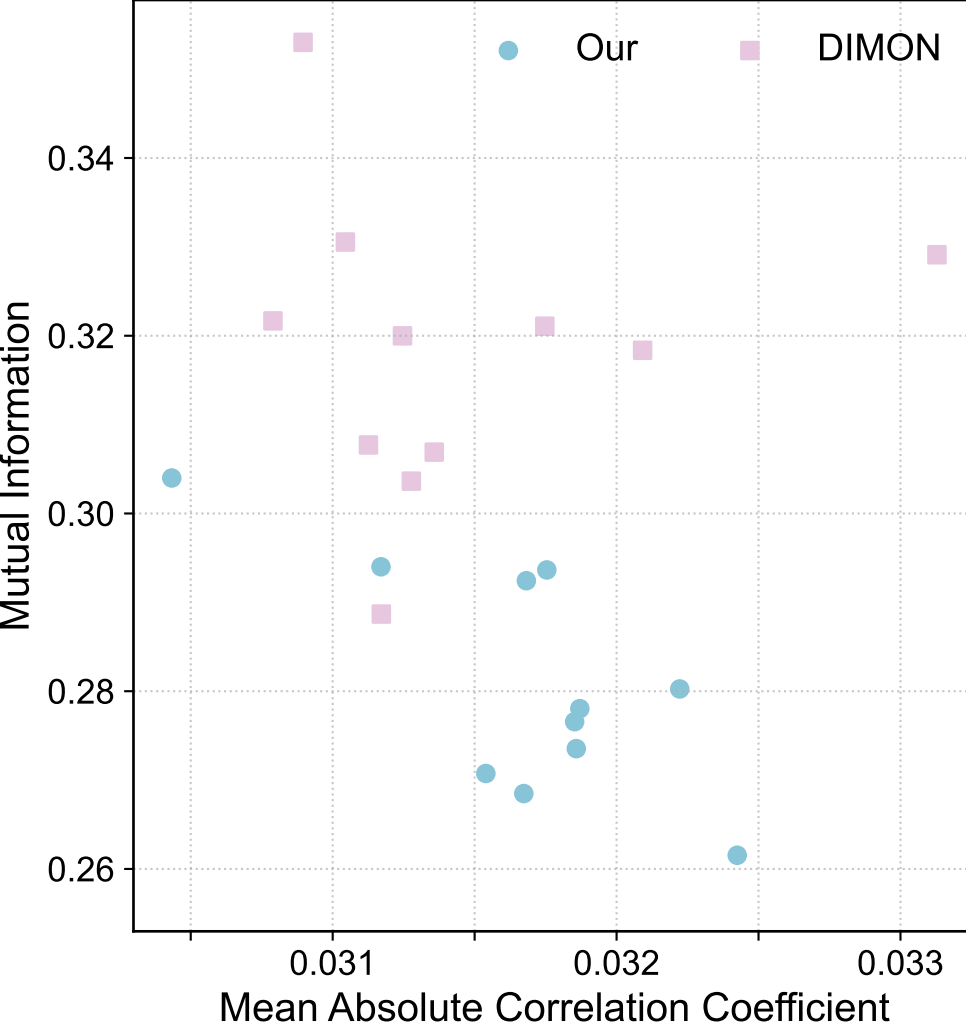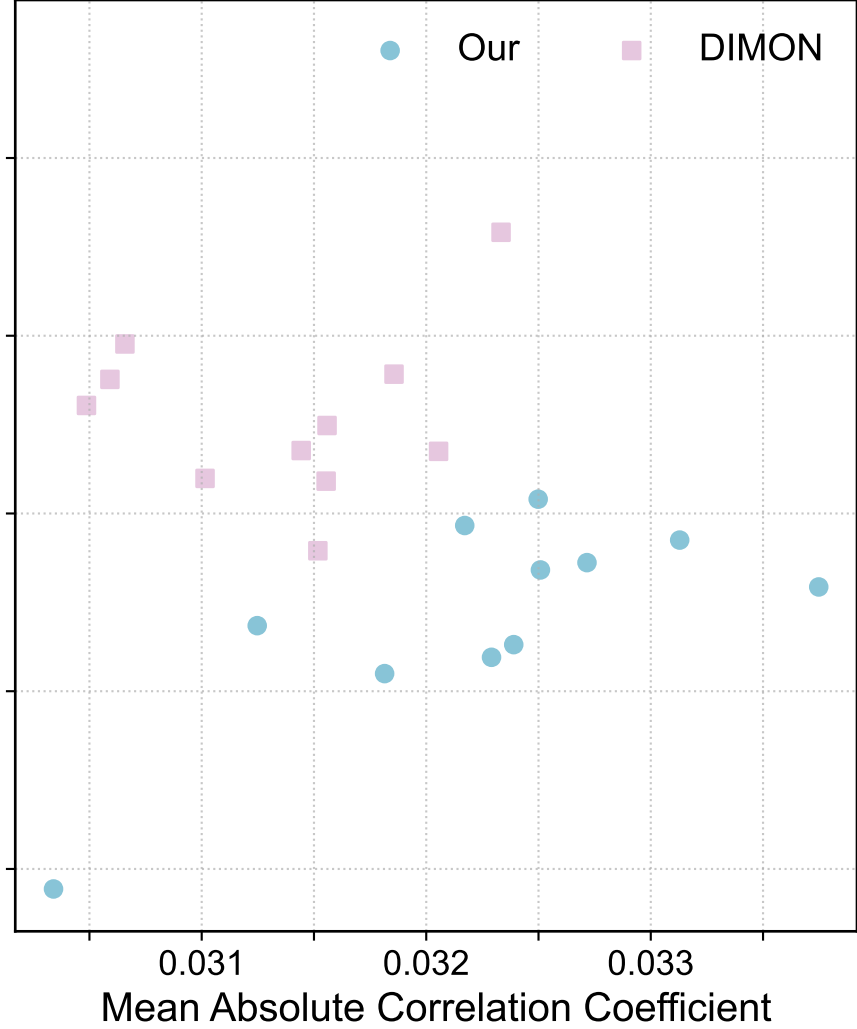

Supplement: supplementary_material [file chart_002.pdf › analysis_angle_010/charts/chart_002.pdf]

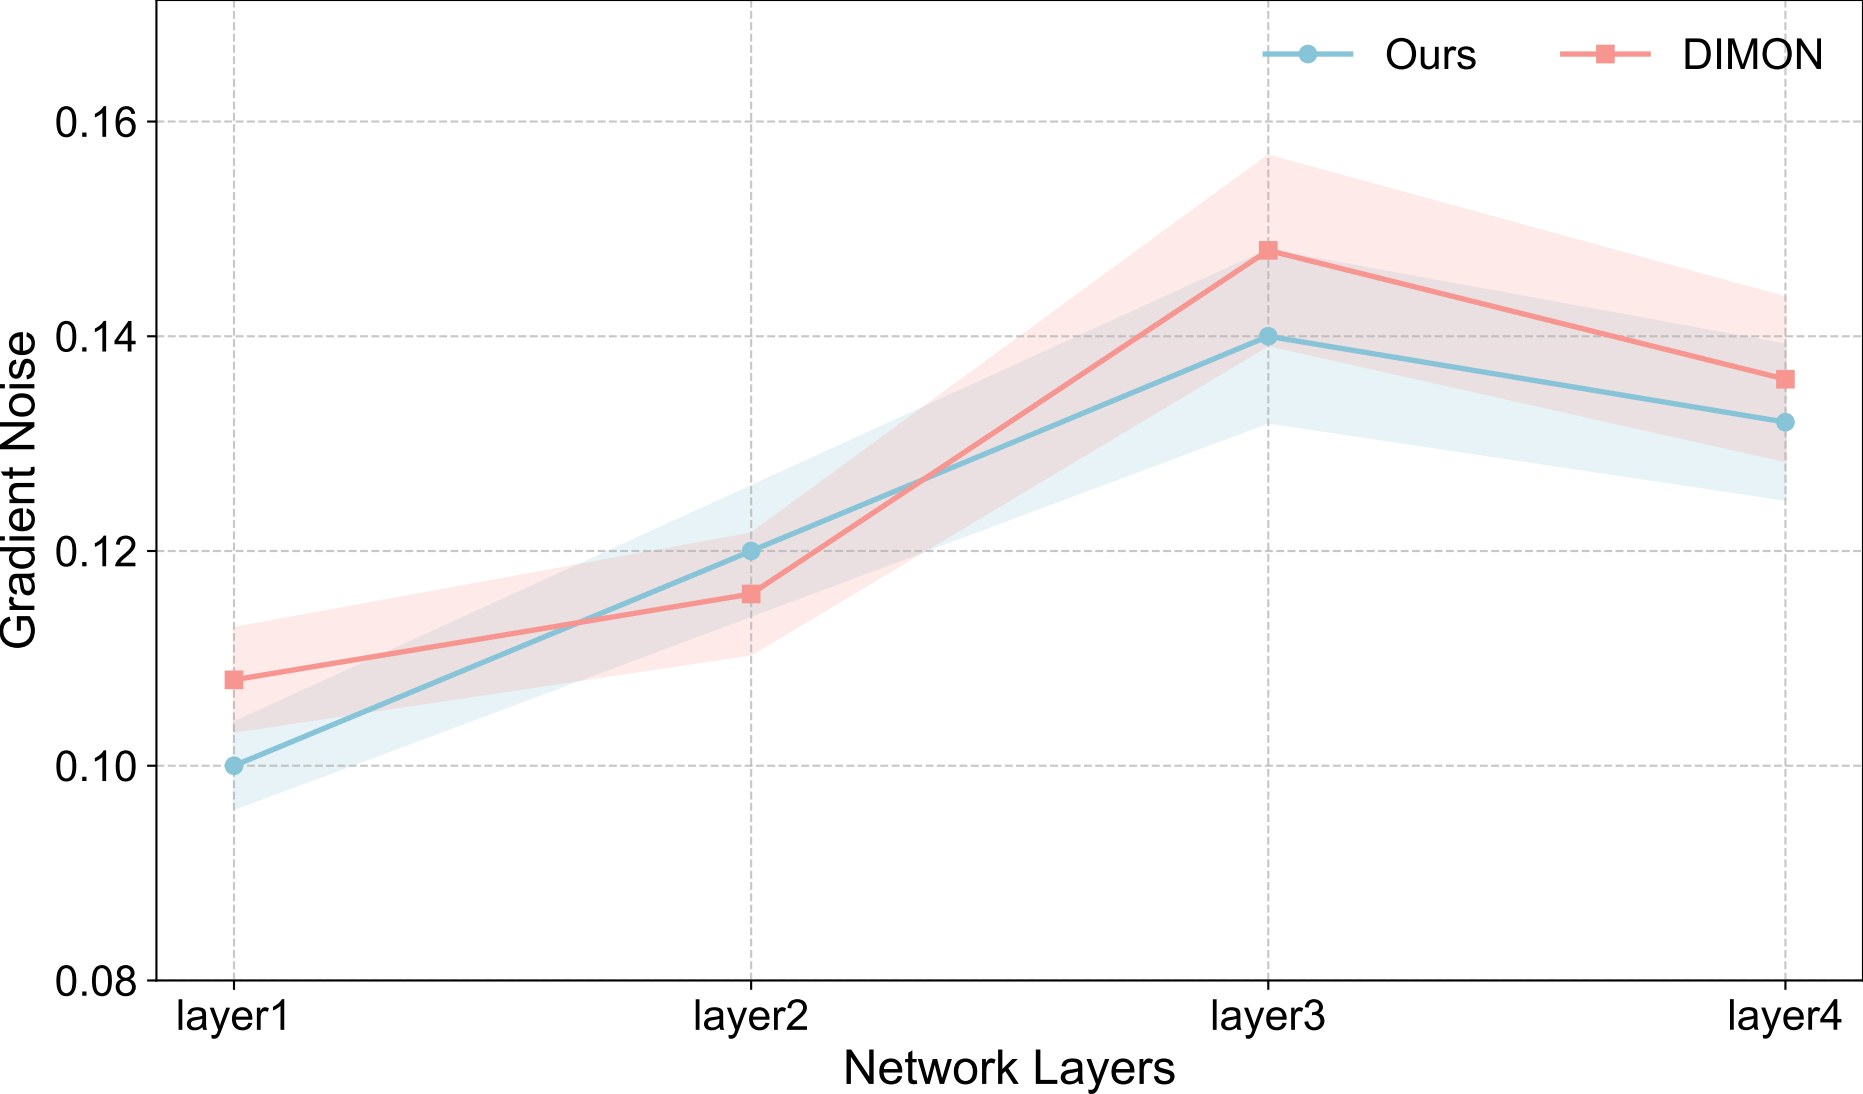

Supplement: supplementary_material [file chart_000.pdf › analysis_angle_025/charts/chart_000.pdf]

Branch1

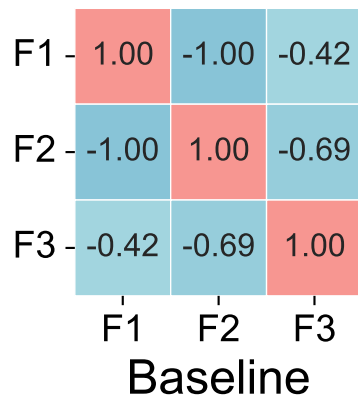

Branch2

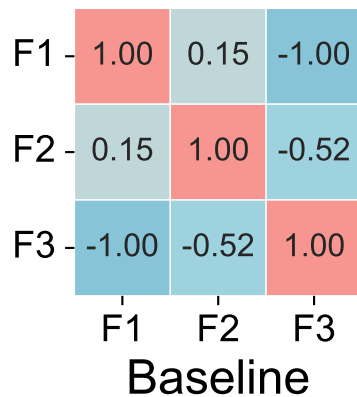

Trunk

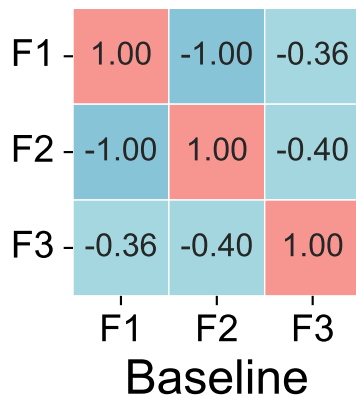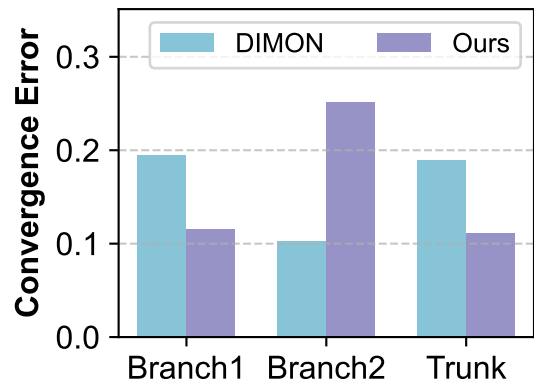

Branch1

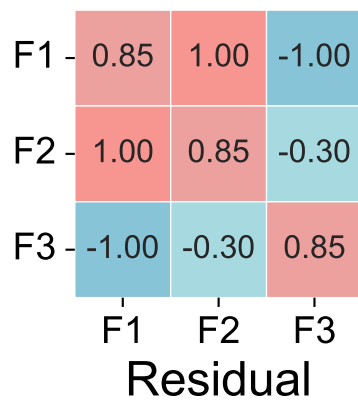

Branch2

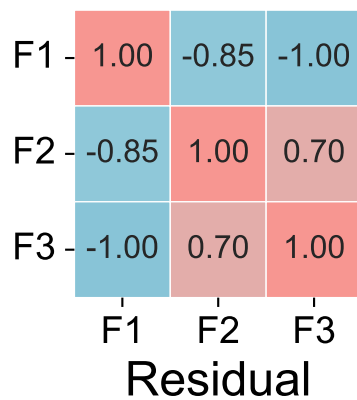

Trunk

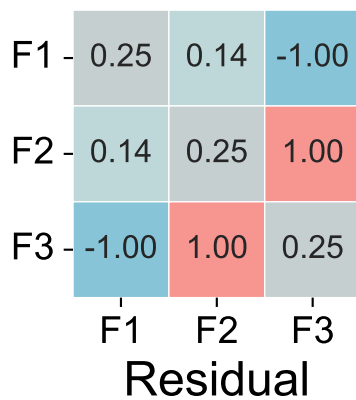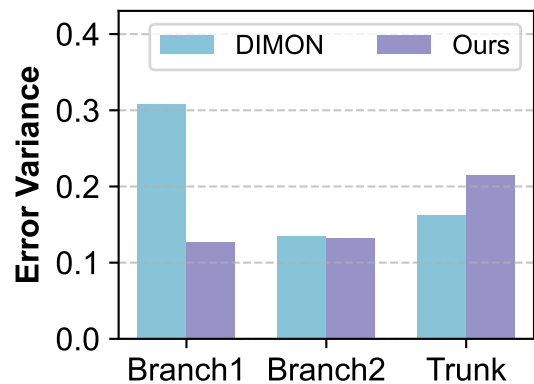

Supplement: supplementary_material [file chart_000.pdf › analysis_angle_029/charts/chart_000.pdf]

Branch1

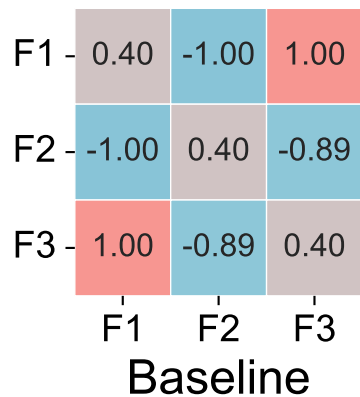

Branch2

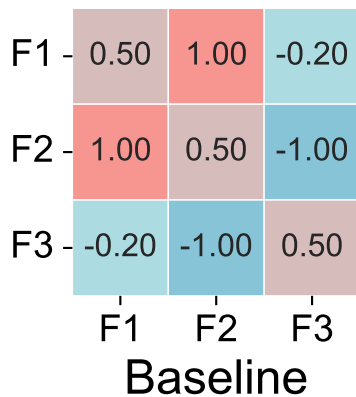

Trunk

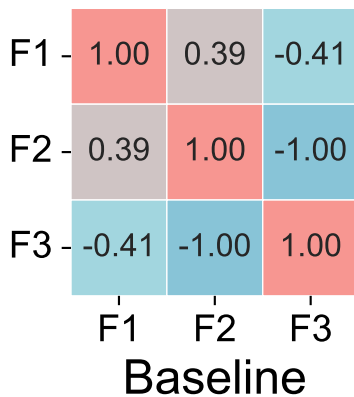

Convergence Error

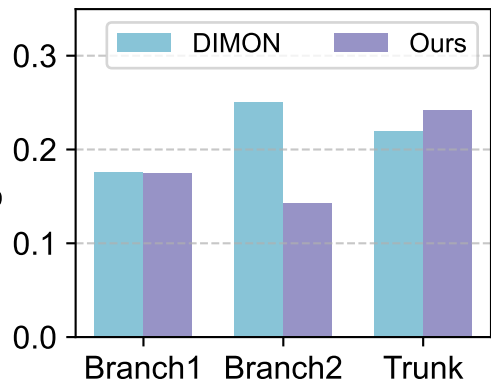

Branch1

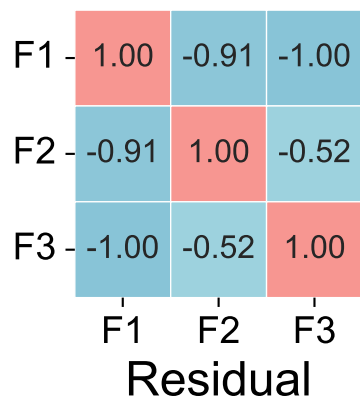

Branch2

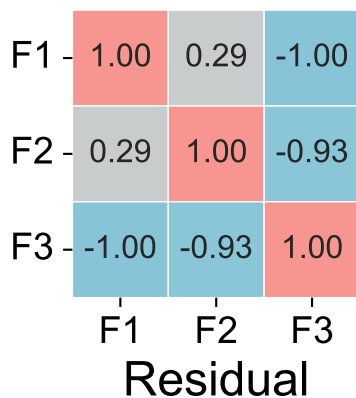

Trunk

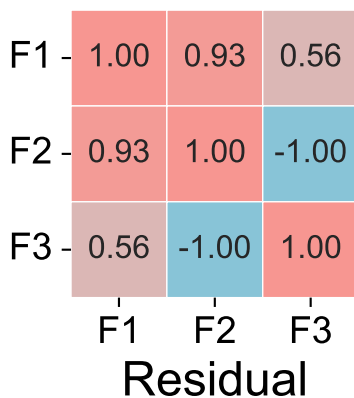

Error Variance

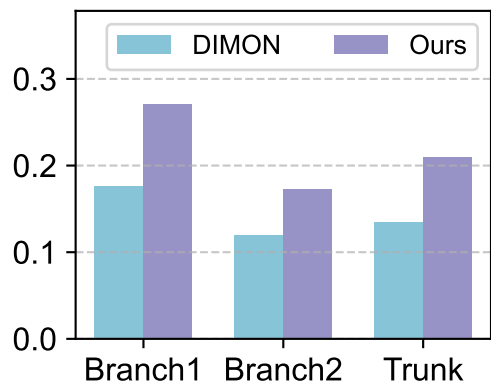

Supplement: supplementary_material [file chart_001.pdf › analysis_angle_029/charts/chart_001.pdf]

Branch1

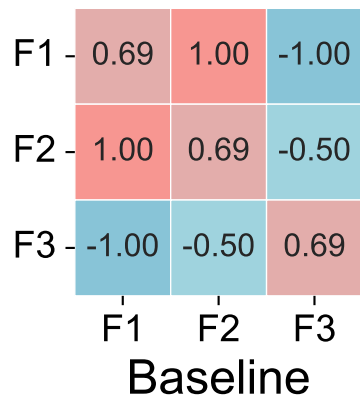

Branch2

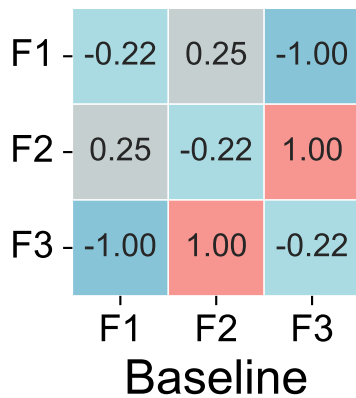

Trunk

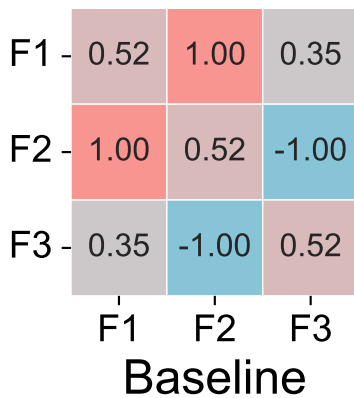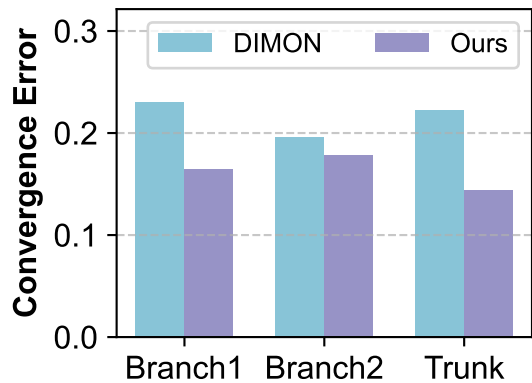

Branch1

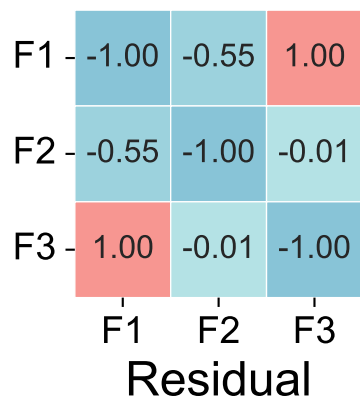

Branch2

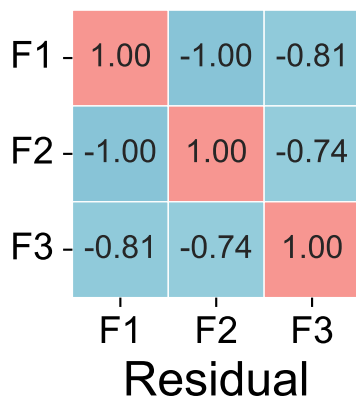

Trunk

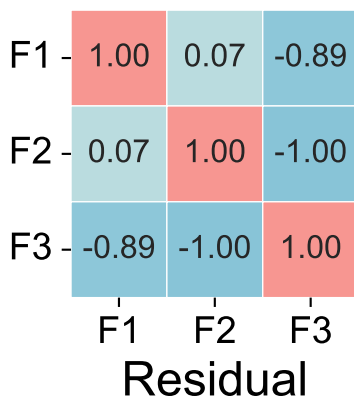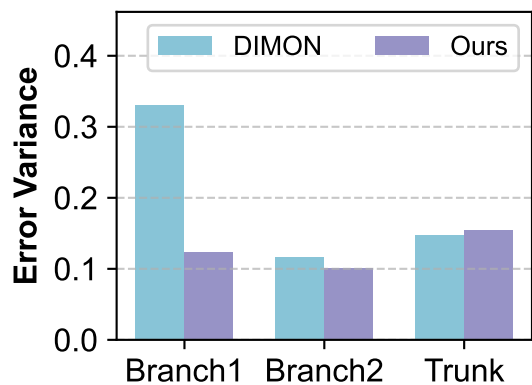

Supplement: supplementary_material [file chart_002.pdf › analysis_angle_029/charts/chart_002.pdf]

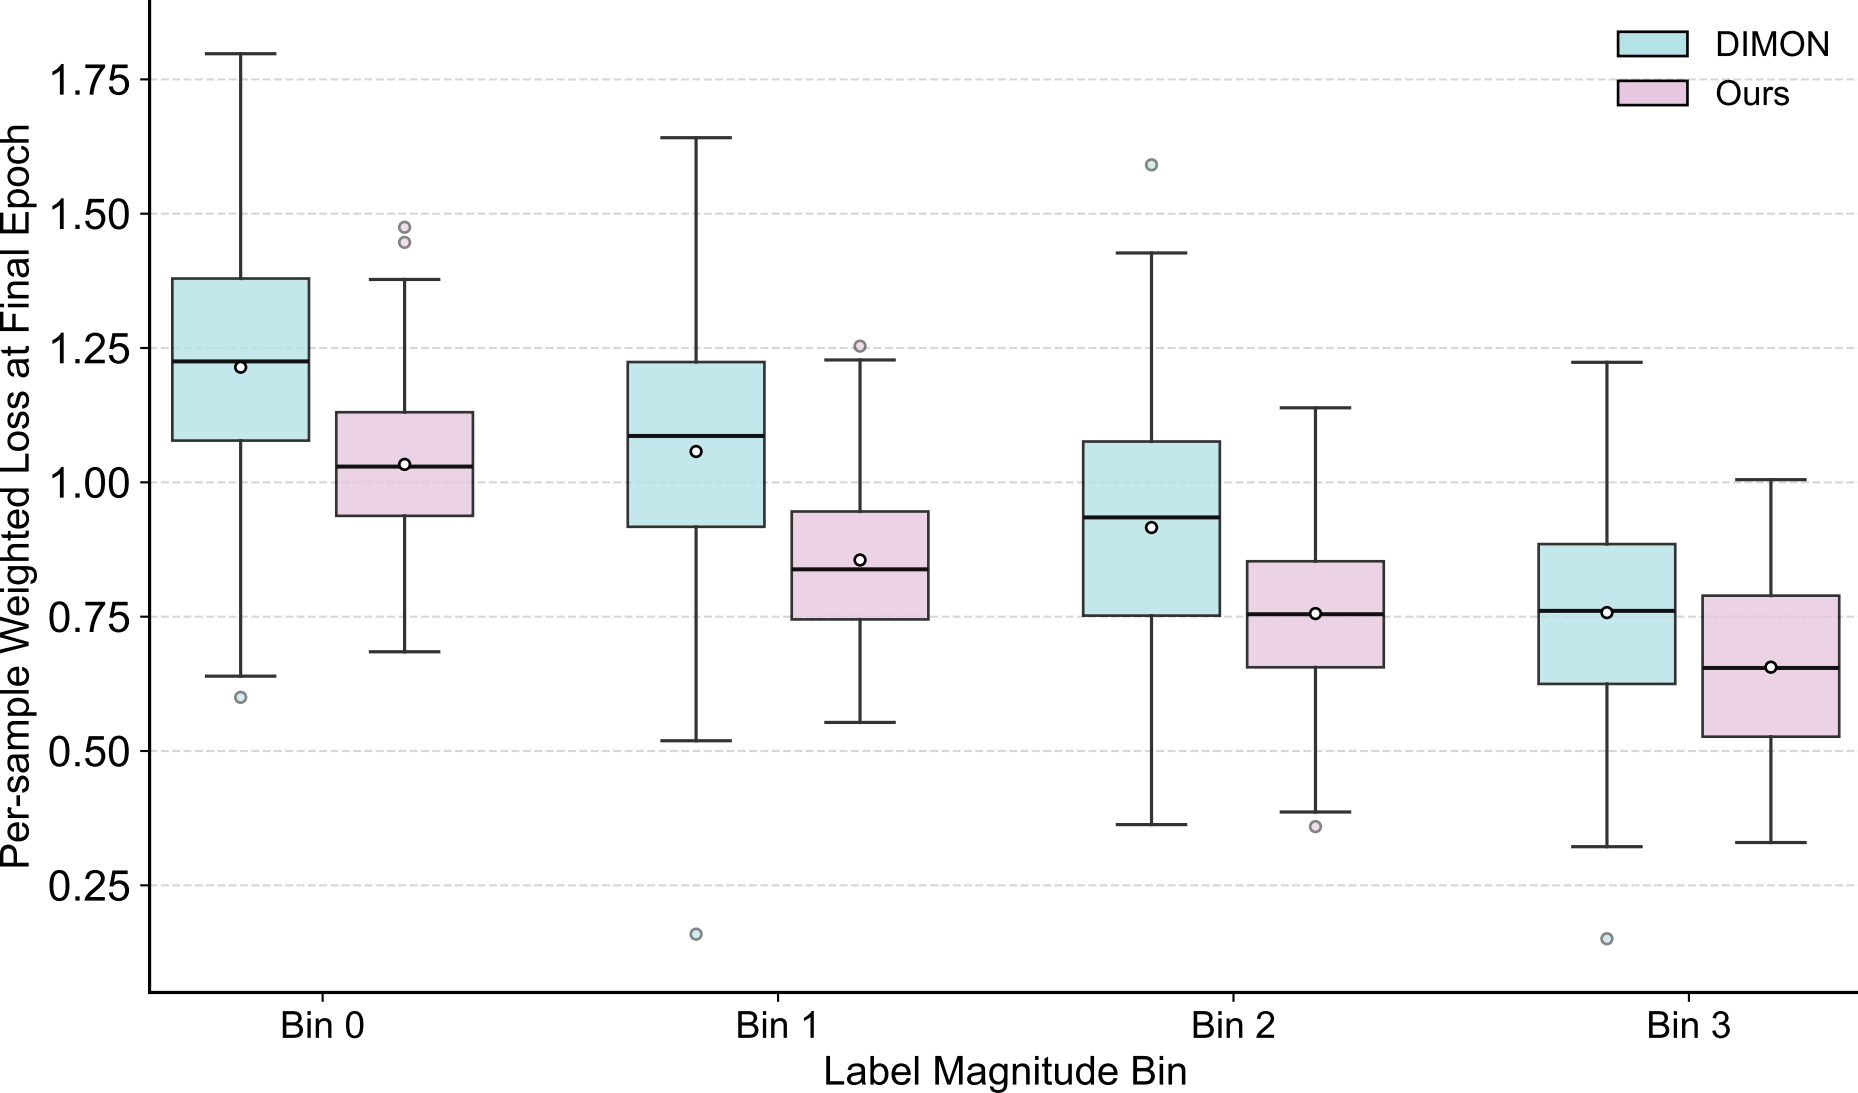

Supplement: supplementary_material [file chart_000.pdf › analysis_angle_031/charts/chart_000.pdf]

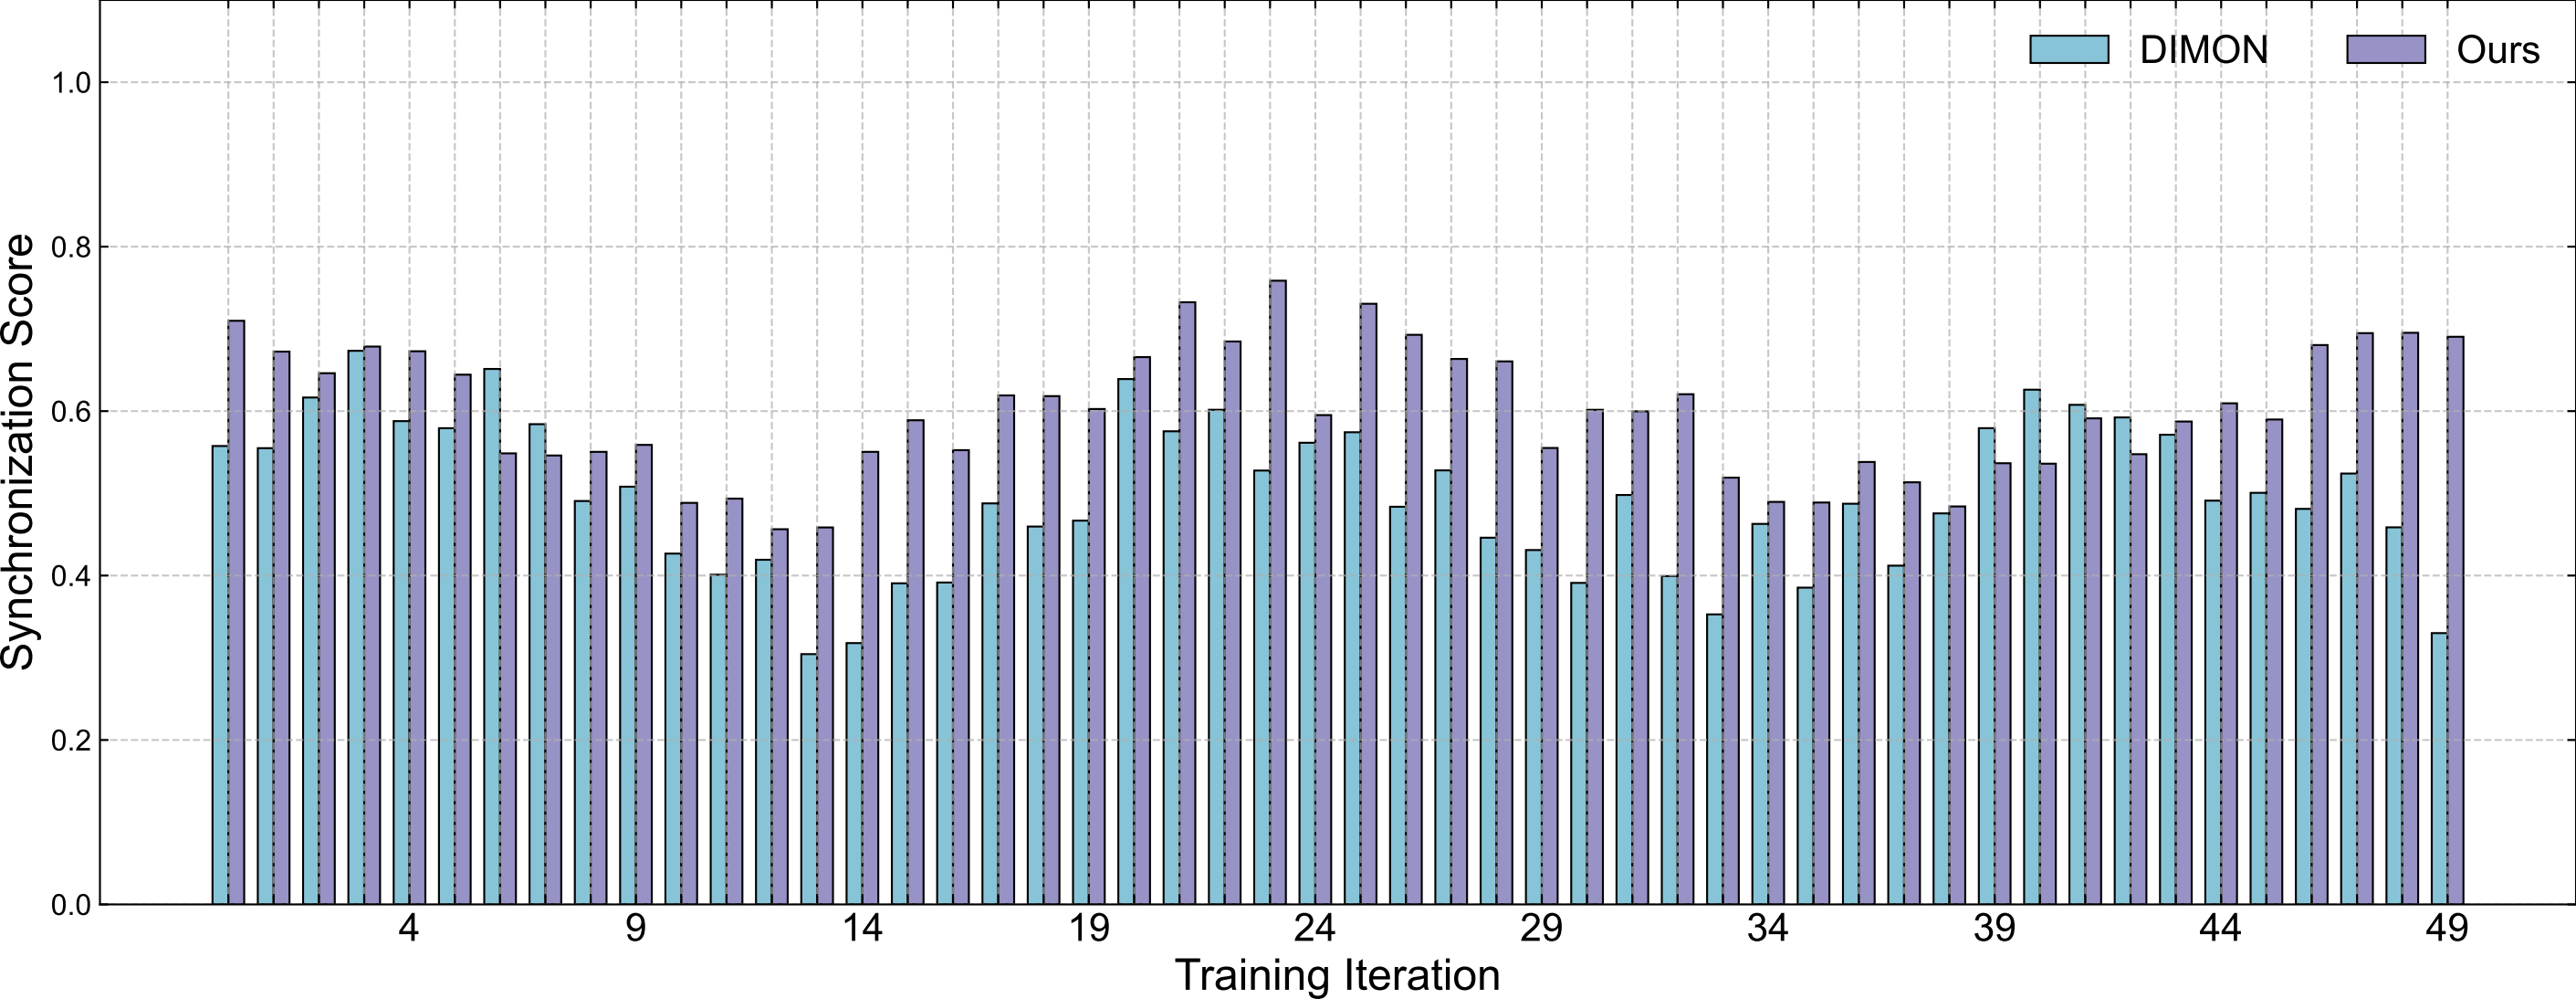

Supplement: supplementary_material [file chart_000.pdf › analysis_angle_047/charts/chart_000.pdf]
